# Supplementary material
Source: publisher site journal article supplement (https://www.dovepress.com/article/395492)
Supplement: Supplementary file 1 [file get_supplementary_file.php]

Table S1 Databases and software information involved in the study

| Name | Website |
| --- | --- |
| GEO database | http://www.ncbi.nlm.nih.gov/geo |
| Jvenn platform | http://bioinfo.genotoul.fr/jvenn/example.html |
| TargetScan 8.0 | http://www.targetscan.org/vert_80/ |
| miRDB | http://mirdb.org |
| miRWalk 3.0 | http://mirwalk.umm.uni-heidelberg.de |
| STRING database | https://string-db.org |
| Cytoscape software(version 3.7.1) | http://www.cytoscape.org/ |
| Cytohubba (Version 1.4) | http://hub.iis.sinica.edu.tw/cytoHubba/ |
| R software(Version 4.1.1) | https://www.r-project.org/ |
